# Supplementary material for: A scenario modeling pipeline for COVID-19 emergency planning
Source: PubMed Central journal article supplement (PMC8024322; doi:10.1038/s41598-021-86811-0), 2021-04-06
Supplement: 41598_2021_86811_MOESM1_ESM.pdf [file 41598_2021_86811_MOESM1_ESM.pdf]

# A scenario modeling pipeline for COVID-19 emergency planning - Supplementary Material

Joseph C. Lemaitre<sup>1</sup>, Kyra H. Grantz<sup>2</sup>, Joshua Kaminsky<sup>2</sup>, Hannah R. Meredith<sup>2</sup>, Shaun A. Truelove<sup>3,4</sup>, Stephen A. Lauer<sup>2</sup>, Lindsay T. Keegan<sup>5</sup>, Sam Shah, Josh Wills, Kathryn Kaminsky, Javier Perez-Saez<sup>2</sup>, Justin Lessler<sup>2</sup>, Elizabeth C. Lee<sup>2</sup>

^ denotes equal contribution

1 Laboratory of Ecohydrology, School of Architecture, Civil and Environmental Engineering, École Polytechnique Fédérale de Lausanne, Lausanne, Switzerland

2 Department of Epidemiology, Johns Hopkins Bloomberg School of Public Health, Baltimore, MD, USA

3 Department of International Health, Johns Hopkins Bloomberg School of Public Health, Baltimore, MD, USA

4 International Vaccine Access Center, Johns Hopkins Bloomberg School of Public Health, Baltimore, MD, USA

5 University of Utah, Department of Internal Medicine, Division of Epidemiology, Salt Lake City, Utah

Correspondence: [elizabeth.c.lee@jhu.edu](mailto:elizabeth.c.lee@jhu.edu)

## Non-pharmaceutical interventions

Table S1. A suite of commonly modeled interventions, listed in order of increasing impact on transmission

| Intervention                                                               | Summary                                                                                                                                                                                                                             | R0 reduction (%) | Reference |
|----------------------------------------------------------------------------|-------------------------------------------------------------------------------------------------------------------------------------------------------------------------------------------------------------------------------------|------------------|-----------|
| School Closures                                                            | Only schools are closed in this mild form of social distancing. Reduction in transmission is based on studies that estimated how influenza transmission was impacted when schools were closed due to holidays or inclement weather. | 16 - 30          | [1,2]     |
| Mild Social Distancing                                                     | Similar to the Washington, D.C. response to the 1918 influenza pandemic when schools, places of worship, and places of entertainment were closed, public meetings banned, and business opening hours staggered.                     | 21 - 33          | [3]       |
| Self Isolation and Household Quarantine                                    | Based on the BBC Pandemic data, cases are assumed to self isolate away from the home and household members of the case self-quarantine within 2.6 - 3.6 days of case being confirmed.                                               | 26 - 37          | [4]       |
| Moderate Social Distancing                                                 | Similar to the Milwaukee, Wisconsin response to the 1918 Influenza Pandemic when all public institutions were closed - schools, places of worship, places of entertainment, and non-essential businesses.                           | 44 - 65          | [3]       |
| Test and Isolate                                                           | Based on the rapid testing and isolation efforts put in place in South Korea in response to COVID-19.                                                                                                                               | 48 - 76          | [5]       |
| Self Isolation, Household Quarantine, and Contact Tracing of acquaintances | Based on the BBC Pandemic data, cases are assumed to self isolate away from the home and household members of the case self-quarantine within 2.6 - 3.6 days of case being confirmed. It's assumed that 90% of school, 79%          | 53 - 57          | [4]       |

|                                                                                               |                                                                                                                                                                                                                                                                                                                                                                                                     |         |       |
|-----------------------------------------------------------------------------------------------|-----------------------------------------------------------------------------------------------------------------------------------------------------------------------------------------------------------------------------------------------------------------------------------------------------------------------------------------------------------------------------------------------------|---------|-------|
|                                                                                               | of work, and 52% of other contacts are traceable.                                                                                                                                                                                                                                                                                                                                                   |         |       |
| Self Isolation, Household Quarantine, Contact Tracing of acquaintances, and Social Distancing | Based on the BBC Pandemic data, cases are assumed to self isolate away from the home and household members of the case self-quarantine within 2.6 - 3.6 days of case being confirmed. It's assumed that 90% of school, 79% of work, and 52% of other contacts are traceable. Furthermore, mild social distancing is in place that limits contacts outside of home/school/work to at most 4 per day. | 61 - 64 | [4]   |
| United Kingdom-like Lockdown                                                                  | Based on the United Kingdom stay-at-home order in response to COVID-19.                                                                                                                                                                                                                                                                                                                             | 71 - 83 | [6]   |
| Wuhan-like Lockdown                                                                           | Based on the Wuhan stay-at-home order in response to COVID-19, where residents were not allowed to leave the city.                                                                                                                                                                                                                                                                                  | 81 - 89 | [7,8] |

## Health outcomes

For our work, we have been using this functionality to include age-standardized probabilities of hospitalization, ICU admission, and death; there is currently limited data on the age-specific risk of ventilation among ICU patients, and we used a single, average risk of ventilation across all locations. We reviewed the literature for relevant age-specific estimates of risk of each health outcome, and used a logistic generalized additive model (GAM) with penalized cubic spline for age and random effect for study to estimate the risk for 10-year aggregated age categories. We then apply these age-specific estimates to the population age distribution in each location to get location-specific, age-adjusted estimates. We assume that individuals of all ages are at equal risk of infection.

Table S2. Selected estimates of health outcomes risk and timings.

| Event                                                                                                                                                                                                     | Summary                                                                     | Risk              |                      | Reference                                                                        |
|-----------------------------------------------------------------------------------------------------------------------------------------------------------------------------------------------------------|-----------------------------------------------------------------------------|-------------------|----------------------|----------------------------------------------------------------------------------|
| <b>Hospitalization</b>                                                                                                                                                                                    | Probability of hospitalization given infection                              | 2.5%, 5%, 10%     |                      | User defined; often taken to be 10x risk of death among all infected individuals |
| <b>Death</b>                                                                                                                                                                                              | Probability of death given infection                                        | 0.25%, 0.5%, 1%   |                      | User defined                                                                     |
| <b>ICU admission</b>                                                                                                                                                                                      | Probability of ICU admission among those hospitalized                       | 26.4%             |                      | [9]                                                                              |
|                                                                                                                                                                                                           |                                                                             | 14.2%             |                      | [10]                                                                             |
|                                                                                                                                                                                                           |                                                                             | 9.0%              |                      | [11]                                                                             |
| <b>Ventilation</b>                                                                                                                                                                                        | Probability of invasive ventilation among those admitted to the ICU         | 15%               |                      | [12]                                                                             |
|                                                                                                                                                                                                           |                                                                             | 85.8%             |                      | [10]                                                                             |
|                                                                                                                                                                                                           |                                                                             | 88.5%             |                      | [11]                                                                             |
| *Note that age-specific estimates of these risks and code to summarize these values can be found at <a href="https://github.com/HopkinsIDD/covidSeverity">https://github.com/HopkinsIDD/covidSeverity</a> |                                                                             |                   |                      |                                                                                  |
| Event                                                                                                                                                                                                     | Summary                                                                     | Parameters        | Timing               | Reference                                                                        |
| <b>Hospitalization</b>                                                                                                                                                                                    | <b>Time from symptom onset to first hospitalization</b>                     | Log-mean, log-sd  | 1.23, 0.79           | [13]                                                                             |
|                                                                                                                                                                                                           |                                                                             | Gamma shape, rate | 0.8, 0.18            | [14]                                                                             |
|                                                                                                                                                                                                           |                                                                             | Gamma shape, rate | 0.71, 0.27           | [14]                                                                             |
|                                                                                                                                                                                                           |                                                                             | Median, IQR       | 11, 8-14             | [15]                                                                             |
|                                                                                                                                                                                                           |                                                                             | Median            | 5.5                  | [16]                                                                             |
| <b>Hospital Discharge</b>                                                                                                                                                                                 | <b>Length of hospital stay</b><br>Time from hospital admission to discharge | Log-mean, log-sd  | log(11.5), log(1.22) | [16]                                                                             |
|                                                                                                                                                                                                           |                                                                             | Median, IQR       | 10. 7-14             | [17]                                                                             |
|                                                                                                                                                                                                           |                                                                             | Median, IQR       | 12, 10-14            | [18]                                                                             |

|                      |                                                                                                                                                                                                                                                                                                                    |                  |               |                                                                                                                   |
|----------------------|--------------------------------------------------------------------------------------------------------------------------------------------------------------------------------------------------------------------------------------------------------------------------------------------------------------------|------------------|---------------|-------------------------------------------------------------------------------------------------------------------|
|                      |                                                                                                                                                                                                                                                                                                                    | Median, IQR      | 12, 9-15      | [15]                                                                                                              |
| <b>Death</b>         | <b>Time from symptom onset to death</b>                                                                                                                                                                                                                                                                            | Log-mean, log-sd | 2.84, 0.52    | [19]                                                                                                              |
|                      |                                                                                                                                                                                                                                                                                                                    | mean, sd         | 22.3, 0.42    | [20]                                                                                                              |
|                      |                                                                                                                                                                                                                                                                                                                    | Mean, sd         | 18.8, 0.45    | [21]                                                                                                              |
|                      |                                                                                                                                                                                                                                                                                                                    | Median, IQR      | 18.5, 15 - 22 | [15]                                                                                                              |
| <b>ICU admission</b> | <b>Time from hospital admission to ICU admission</b><br>There are few direct estimates of the rate of ICU admission following hospitalization. Two small case series reported medians of 1 - 3d. Other studies estimated the time from symptom onset to ICU admission to be 10 - 12 days                           | Log-mean, log-sd | log(3), 0.3   | [12,15,17]                                                                                                        |
| <b>ICU discharge</b> | <b>Length of ICU stay</b><br>Time from ICU admission to ICU discharge                                                                                                                                                                                                                                              | Log-mean, log-sd | log(8), 0.2   | [15]                                                                                                              |
| <b>Ventilation</b>   | <b>Time from ICU admission to ventilation</b><br>There are few direct estimates of the rate of ventilation following ICU admission. Two studies estimated the time from symptom onset to ventilation to be 10.5 - 14.5 days, or 0 - 2 days longer than the time from symptom onset to ICU admission in each study. | Log-mean, log-sd | log(1), 0.4   | [12,15]                                                                                                           |
| <b>Extubation</b>    | <b>Length of ventilation</b>                                                                                                                                                                                                                                                                                       | Log-mean, log-sd | log(7), 0.2   | 1 day shorter than ICU duration; one estimate of 4 patients had mean 17 days so this may be an underestimate [22] |

## Example YAML configuration file

Please see additional details for each of these configuration file options in the wiki page of the GitHub template repository “HopkinsIDD/COVID19\_Minimal.”

```
name: location-x
start_date: 2020-01-31
end_date: 2020-12-31
nsimulations: 1000
dt: 0.25
report_location_name: Location X

spatial_setup:
  base_path: data/location-x
  setup_name: location-x
  geodata: geodata.csv
  shapefile_name: shp_location_x/counties_2018.shp
  shapefile: shp_location_x/counties_2018.shp
  mobility: mobility.csv
  popnodes: pop2010
  nodenames: geoid
  census_year: 2010
  modeled_states:
    - AA
    - BB
    - CC
  include_in_report: targeted

importation:
  census_api_key: "insert_key_here"
  travel_dispersion: 3
  maximum_destinations: Inf
  dest_type : state
  dest_country : USA
  aggregate_to: airport
  cache_work: TRUE
  update_case_data: TRUE
  draw_travel_from_distribution: FALSE
  print_progress: FALSE
  travelers_threshold: 10000
  airport_cluster_distance: 80
  param_list:
```

incub\_mean\_log: log(5.89)  
incub\_sd\_log: log(1.74)  
inf\_period\_nohosp\_mean: 15  
inf\_period\_nohosp\_sd: 5  
inf\_period\_hosp\_mean\_log: 1.23  
inf\_period\_hosp\_sd\_log: 0.79  
inf\_period\_hosp\_shape: 0.75  
inf\_period\_hosp\_scale: 5.367  
p\_report\_source: [0.05, 0.25]  
shift\_incid\_days: -10  
delta: 1

seeding:

method: FolderDraw  
folder\_path: importation/location-x/

interventions:

scenarios:

- Uncontrolled
- SocialDistancing\_fixed
- SocialDistancing\_fatigued
- SocialDistancing\_pulsed
- SocialDistancing\_checker

settings:

Uncontrolled:

template: ReduceR0  
period\_start\_date: 2020-03-19  
period\_end\_date: 2020-05-14  
value:  
distribution: fixed  
value: 0

SocialDistancing\_fixed:

template: ReduceR0  
period\_start\_date: 2020-03-19  
period\_end\_date: 2020-12-31  
value:  
distribution: uniform  
low: .71  
high: .83

SocialDistancing\_checker:

template: ReduceR0  
affected\_geoids: ["County B", "County E", "County F"]  
period\_start\_date: 2020-03-19

period\_end\_date: 2020-12-31  
value:  
  distribution: uniform  
  low: .71  
  high: .83

SD\_Deg1:  
  template: ReduceR0  
  period\_start\_date: 2020-03-19  
  period\_end\_date: 2020-04-12  
  value:  
    distribution: uniform  
    low: .71  
    high: .83

SD\_Deg2:  
  template: ReduceR0  
  period\_start\_date: 2020-04-13  
  period\_end\_date: 2020-04-26  
  value:  
    distribution: uniform  
    low: .71\*.90  
    high: .83\*.90

SD\_Deg3:  
  template: ReduceR0  
  period\_start\_date: 2020-04-27  
  period\_end\_date: 2020-05-10  
  value:  
    distribution: uniform  
    low: .71\*.80  
    high: .83\*.80

SD\_Deg3\_Road2Recovery:  
  template: ReduceR0  
  period\_start\_date: 2020-04-27  
  period\_end\_date: 2020-05-14  
  value:  
    distribution: uniform  
    low: .71\*.80  
    high: .83\*.80

SD\_Deg4:  
  template: ReduceR0  
  period\_start\_date: 2020-05-11  
  period\_end\_date: 2020-05-24  
  value:  
    distribution: uniform



```
    low: .71*.70
    high: .83*.70
SD_Deg5:
  template: ReduceR0
  period_start_date: 2020-05-25
  period_end_date: 2020-06-14
  value:
    distribution: uniform
    low: .71*.60
    high: .83*.60
SD_Deg6:
  template: ReduceR0
  period_start_date: 2020-06-15
  period_end_date: 2020-06-28
  value:
    distribution: uniform
    low: .71*.50
    high: .83*.50
SD_Deg7:
  template: ReduceR0
  period_start_date: 2020-06-29
  period_end_date: 2020-07-12
  value:
    distribution: uniform
    low: .71*.40
    high: .83*.40
SD_Deg8:
  template: ReduceR0
  period_start_date: 2020-07-13
  period_end_date: 2020-08-31
  value:
    distribution: uniform
    low: .71*.30
    high: .83*.30
SD_Deg9:
  template: ReduceR0
  period_start_date: 2020-09-01
  period_end_date: 2020-12-31
  value:
    distribution: uniform
    low: .71*.20
    high: .83*.20
SD_Pulse1:
```

```
template: ReduceR0
period_start_date: 2020-03-19
period_end_date: 2020-04-08
value:
  distribution: uniform
  low: .71
  high: .83
SD_Pulse2:
template: ReduceR0
period_start_date: 2020-04-30
period_end_date: 2020-05-20
value:
  distribution: uniform
  low: .71
  high: .83
SD_Pulse3:
template: ReduceR0
period_start_date: 2020-06-11
period_end_date: 2020-07-01
value:
  distribution: uniform
  low: .71
  high: .83
SD_Pulse4:
template: ReduceR0
period_start_date: 2020-07-23
period_end_date: 2020-08-12
value:
  distribution: uniform
  low: .71
  high: .83
SocialDistancing_fatigued:
template: Stacked
scenarios:
  - SD_Deg1
  - SD_Deg2
  - SD_Deg3
  - SD_Deg4
  - SD_Deg5
  - SD_Deg6
  - SD_Deg7
  - SD_Deg8
  - SD_Deg9
```

```
SocialDistancing_pulsed:  
  template: Stacked  
  scenarios:  
    - SD_Pulse1  
    - SD_Pulse2  
    - SD_Pulse3  
    - SD_Pulse4
```

```
seir:  
  parameters:  
    sigma: 1 / 5.2  
    gamma:  
      distribution: uniform  
      low: 1 / 6  
      high: 1 / 2.6  
  R0s:  
    distribution: uniform  
    low: 2  
    high: 3
```

```
hospitalization:  
  paths:  
    output_path: hospitalization  
    run_age_adjust: TRUE  
  parameters:  
    time_hosp: [log(7), 0.3]  
    time_disch: [log(11.5), 0.20]  
    time_ICU: [log(3), 0.3]  
    time_ICUdur: [log(8), 0.2]  
    time_ventdur: [log(7), 0.2]  
    time_vent: [log(1), 0.4]  
    time_onset_death: [log(17.1), 0.52]  
    p_death: [.01]  
    p_death_names: ["high"]  
    p_hosp_inf: [0.1]
```

```
report:  
  data_settings:  
    pop_year: 2018  
  plot_settings:  
    plot_intervention: TRUE  
  formatting:  
    scenario_labels_short: ["UC", "SDfix", "SDfat", "SDpul", "SDchx"]
```

```

scenario_labels:
- "Uncontrolled"
- "Social Distancing Fixed"
- "Social Distancing Fatigued"
- "Social Distancing Pulsed"
- "Social Distancing Checker"
scenario_colors: ["#993404", "#D95F02", "#1B9E77", "#7570B3",
"#4278cf"]
pdeath_labels: ["1% IFR"]
display_dates: ["2020-04-01", "2020-05-01", "2020-06-01",
"2020-07-01", "2020-08-01", "2020-09-01"]
display_dates2: ["2020-05-01", "2020-07-01", "2020-09-01"]

```

#### Supplementary References:

1. Jackson ML, Hart GR, McCulloch DJ, Adler A, Brandstetter E, Fay K, et al. Effects of weather-related social distancing on city-scale transmission of respiratory viruses. medRxiv. 2020. Available: <https://www.medrxiv.org/content/10.1101/2020.03.02.20027599v1.abstract>
2. Cauchemez S, Valleron A-J, Boëlle P-Y, Flahault A, Ferguson NM. Estimating the impact of school closure on influenza transmission from Sentinel data. *Nature*. 2008;452: 750–754.
3. Bootsma MCJ, Ferguson NM. The effect of public health measures on the 1918 influenza pandemic in US cities. *Proceedings of the National Academy of Sciences*. 2007;104: 7588–7593.
4. Kucharski AJ, Klepac P, Conlan A, Kissler SM, Tang M, Fry H, et al. Effectiveness of isolation, testing, contact tracing and physical distancing on reducing transmission of SARS-CoV-2 in different settings. medRxiv. 2020. Available: <https://www.medrxiv.org/content/10.1101/2020.04.23.20077024v1.abstract>
5. Abbott S, Hellewell J, Munday JD, Chun JY, Thompson RN, Bosse NI, et al. Temporal variation in transmission during the COVID-19 outbreak. CMMID Repository. 2020. Available: <https://cmmid.github.io/topics/covid19/global-time-varying-transmission.html>
6. Jarvis CI, Van Zandvoort K, Gimma A, Prem K, Klepac P, Rubin GJ, et al. Quantifying the impact of physical distance measures on the transmission of COVID-19 in the UK. *BMC Med*. 2020;18: 1–10.
7. Zhang B, Zhou H, Zhou F. Study on SARS-COV-2 transmission and the effects of control measures in China. medRxiv. 2020. Available: <https://www.medrxiv.org/content/10.1101/2020.02.16.20023770v1.abstract>
8. Mizumoto K, Kagaya K, Chowell G. Early epidemiological assessment of the transmission potential and virulence of coronavirus disease 2019 (COVID-19) in Wuhan City: China, January-February, 2020. medRxiv. 2020. Available:

<https://www.medrxiv.org/content/10.1101/2020.02.12.20022434v2.abstract>

9. Wu C, Chen X, Cai Y, Xia J 'an, Zhou X, Xu S, et al. Risk Factors Associated With Acute Respiratory Distress Syndrome and Death in Patients With Coronavirus Disease 2019 Pneumonia in Wuhan, China. *JAMA Intern Med.* 2020. doi:10.1001/jamainternmed.2020.0994
10. Richardson S, Hirsch JS, Narasimhan M, Crawford JM, McGinn T, Davidson KW, et al. Presenting Characteristics, Comorbidities, and Outcomes Among 5700 Patients Hospitalized With COVID-19 in the New York City Area. *JAMA.* 2020. doi:10.1001/jama.2020.6775
11. Grasselli G, Zangrillo A, Zanella A, Antonelli M, Cabrini L, Castelli A, et al. Baseline Characteristics and Outcomes of 1591 Patients Infected With SARS-CoV-2 Admitted to ICUs of the Lombardy Region, Italy. *JAMA.* 2020. doi:10.1001/jama.2020.5394
12. Huang C, Wang Y, Li X, Ren L, Zhao J, Hu Y, et al. Clinical features of patients infected with 2019 novel coronavirus in Wuhan, China. *Lancet.* 2020;395: 497–506.
13. Bi Q, Wu Y, Mei S, Ye C, Zou X, Zhang Z, et al. Epidemiology and transmission of COVID-19 in 391 cases and 1286 of their close contacts in Shenzhen, China: a retrospective cohort study. *Lancet Infect Dis.* 2020. doi:10.1016/S1473-3099(20)30287-5
14. Zhang J, Litvinova M, Wang W, Wang Y, Deng X, Chen X, et al. Evolving epidemiology and transmission dynamics of coronavirus disease 2019 outside Hubei province, China: a descriptive and modelling study. *Lancet Infect Dis.* 2020. doi:10.1016/S1473-3099(20)30230-9
15. Zhou F, Yu T, Du R, Fan G, Liu Y, Liu Z, et al. Clinical course and risk factors for mortality of adult inpatients with COVID-19 in Wuhan, China: a retrospective cohort study. *Lancet.* 2020;395: 1054–1062.
16. Sanche S, Lin YT, Xu C, Romero-Severson E, Hengartner N, Ke R. The Novel Coronavirus, 2019-nCoV, is Highly Contagious and More Infectious Than Initially Estimated. *medRxiv.* 2020. doi:10.1101/2020.02.07.20021154
17. Wang D, Hu B, Hu C, Zhu F, Liu X, Zhang J, et al. Clinical Characteristics of 138 Hospitalized Patients With 2019 Novel Coronavirus-Infected Pneumonia in Wuhan, China. *JAMA.* 2020. doi:10.1001/jama.2020.1585
18. Guan W-J, Ni Z-Y, Hu Y, Liang W-H, Ou C-Q, He J-X, et al. Clinical Characteristics of Coronavirus Disease 2019 in China. *N Engl J Med.* 2020;382: 1708–1720.
19. Jung S-M, Akhmetzhanov AR, Hayashi K, Linton NM, Yang Y, Yuan B, et al. Real-Time Estimation of the Risk of Death from Novel Coronavirus (COVID-19) Infection: Inference Using Exported Cases. *J Clin Med Res.* 2020;9. doi:10.3390/jcm9020523
20. Dorigatti I, Okell L, Cori A, Imai N, Baguelin M, Bhatia S, et al. Report 4: severity of 2019-novel coronavirus (nCoV). Imperial College London, London. 2020. Available:

<http://www.corona-portal.de/ImpColl.pdf>

21. Verity R, Okell LC, Dorigatti I, Winskill P, Whittaker C, Imai N, et al. Estimates of the severity of coronavirus disease 2019: a model-based analysis. *Lancet Infect Dis.* 2020. doi:10.1016/S1473-3099(20)30243-7
22. Chen N, Zhou M, Dong X, Qu J, Gong F, Han Y, et al. Epidemiological and clinical characteristics of 99 cases of 2019 novel coronavirus pneumonia in Wuhan, China: a descriptive study. *Lancet.* 2020;395: 507–513.
